# Supplementary material for: Selective regulation of n-dodecane isomerization and cracking performance in Pt/beta catalysts via orientation control of Brønsted acid site distribution
Source: Royal Society of Chemistry journal article supplement (doi:10.1039/d0cy02088e), 2021-01-01
Supplement: d0cy02088e1.pdf [file d0cy02088e1.pdf]

## Supplementary Information

### Selective regulation of n-dodecane isomerization and cracking performance in Pt/Beta catalysts via oriented control of Brønsted acid sites distribution

Zhiqiang Chen,<sup>a, c</sup> Suyao Liu,<sup>b</sup> Huaikang Zhang,<sup>a, b</sup> Peng He,<sup>b</sup> Jie Ren,<sup>a, b\*</sup>

Xiaodong Wen,<sup>a, b\*</sup> Haijun Jiao,<sup>ab</sup> and Yong-Wang Li<sup>a, b</sup>

<sup>a</sup> State Key Laboratory of Coal Conversion, Institute of Coal Chemistry, Chinese Academy of Sciences, Taiyuan 030001, P. R. China.

<sup>b</sup> National Energy Research Center for Clean Fuels, Synfuels China Co., Ltd., Beijing 101400, P. R. China.

<sup>c</sup> University of Chinese Academy of Sciences, Beijing 100049, P. R. China.

\* Corresponding author. Tel: +86-10-69667855. E-mail address: renjie@sxicc.ac.cn (Jie. Ren).

Tel: +86-10-69667816. E-mail address: wxd@sxicc.ac.cn (Xiaodong. Wen).

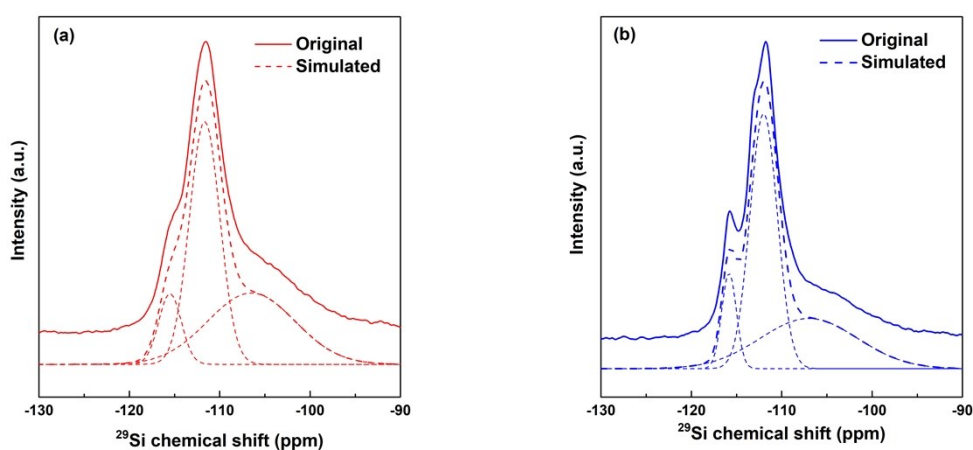

**Fig. S1.** <sup>29</sup>Si MAS NMR spectra of Beta (a) and Beta-N (b) samples.

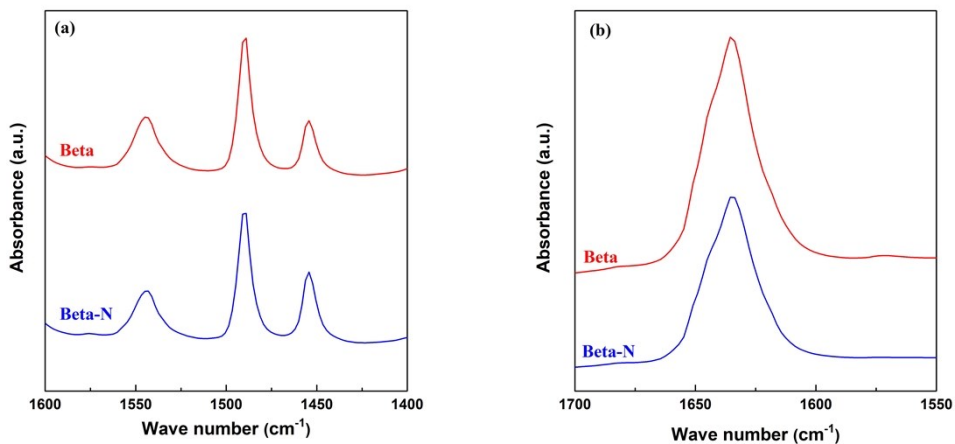

**Fig. S2.** IR spectra of pyridine adsorbed (a) and 2,4,6-trimethylpyridine adsorbed (b) on Beta and Beta-N.

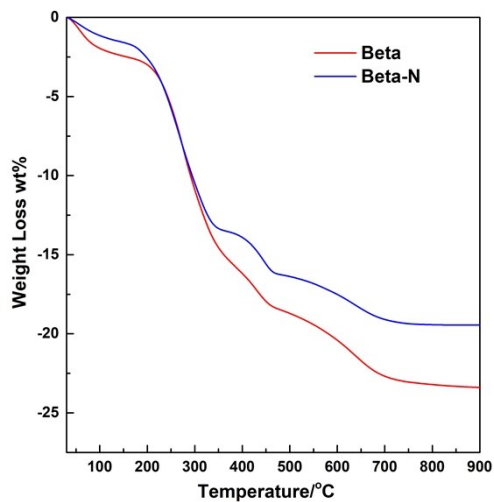

**Fig. S3.** TGA curves for the Beta and Beta-N samples.

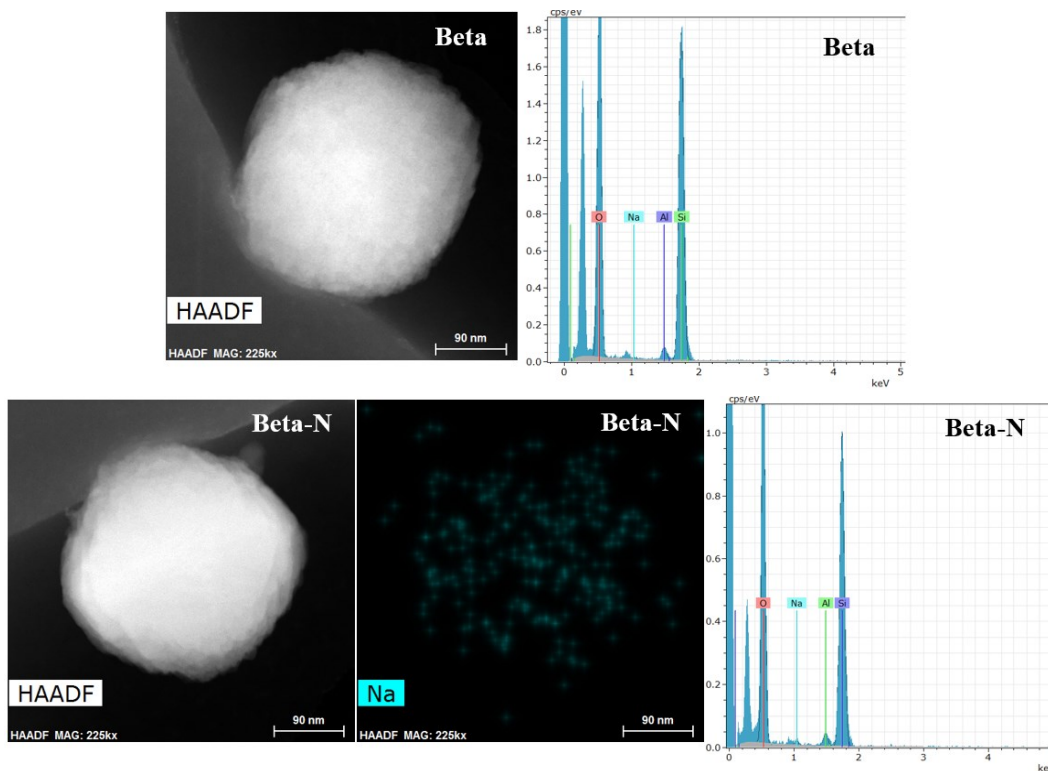

Fig. S4. EDS mapping of Beta and Beta-N samples.

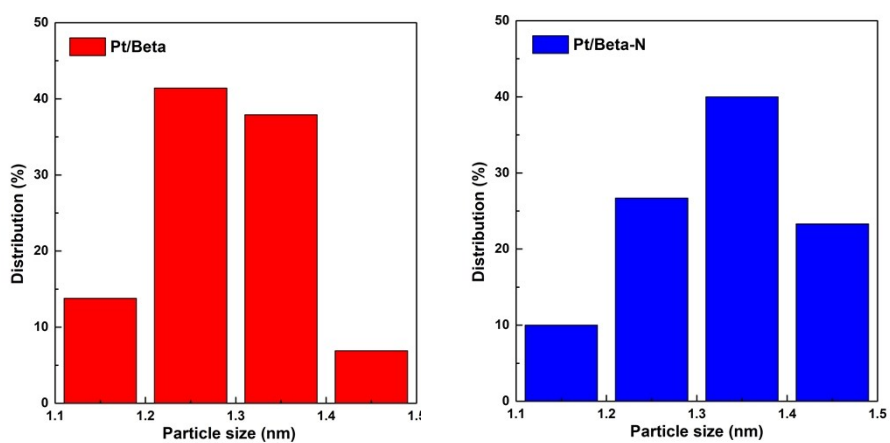

Fig. S5. The Pt particle size distribution over Pt/Beta and Pt/Beta-N catalysts.

---
